# Supplementary material for: Association between Childhood Suicidal Ideation and Geriatric Depression in Japan: A Population-Based Cross-Sectional Study
Source: PubMed Central journal article supplement (PMC7178046; doi:10.3390/ijerph17072257), 2020-03-27
Supplement: ijerph-17-02257-s001.pdf [file ijerph-17-02257-s001.pdf]

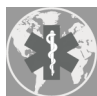

## Supplementary Materials

**Supplementary Table 1.** Medical conditions of the participants (n = 1,140).

| Variable                 | Suicidality in Childhood |      |               |      |              |      | p-Value |
|--------------------------|--------------------------|------|---------------|------|--------------|------|---------|
|                          | All                      |      | No (n = 1071) |      | Yes (n = 69) |      |         |
|                          | n                        | %    | n             | %    | n            | %    |         |
| Hypertension             | 620                      | 54.4 | 588           | 54.9 | 32           | 46.4 | 0.17    |
| Stroke                   | 15                       | 1.3  | 14            | 1.3  | 1            | 1.4  | 0.92    |
| Heart diseases           | 116                      | 10.2 | 101           | 9.4  | 15           | 21.7 | 0.001   |
| Diabetes                 | 172                      | 15.1 | 160           | 14.9 | 12           | 17.4 | 0.58    |
| Parkinson disease        | 5                        | 0.4  | 5             | 0.5  | 0            | 0    | 0.57    |
| Obesity (BMI≥30)         | 38                       | 3.3  | 35            | 3.3  | 3            | 4.3  | 0.35    |
| Psychopathology          | 9                        | 0.8  | 8             | 0.7  | 1            | 1.4  | 0.52    |
| Hyperlipidemia           | 189                      | 16.6 | 173           | 16.2 | 16           | 23.2 | 0.13    |
| Respiratory disease      | 48                       | 4.2  | 45            | 4.2  | 3            | 4.3  | 0.95    |
| Gastrointestinal disease | 91                       | 8    | 89            | 8.3  | 2            | 2.9  | 0.11    |
| Urological disease       | 91                       | 8    | 85            | 7.9  | 6            | 8.7  | 0.82    |
| Musculoskeletal disease  | 110                      | 9.6  | 100           | 9.3  | 10           | 14.5 | 0.16    |
| Injury                   | 15                       | 1.3  | 12            | 1.1  | 3            | 4.3  | 0.02    |
| Cancer                   | 61                       | 5.4  | 59            | 5.5  | 2            | 2.9  | 0.35    |
| Hematological disease    | 9                        | 0.8  | 7             | 0.7  | 2            | 2.9  | 0.04    |
| Ophthalmological disease | 201                      | 17.6 | 181           | 16.9 | 20           | 29   | 0.01    |
| Otorhinological disease  | 39                       | 3.4  | 34            | 3.2  | 5            | 7.2  | 0.07    |
| Sleep disorder           | 2                        | 0.2  | 2             | 0.2  | 0            | 0    | 0.72    |
| Other                    | 97                       | 8.5  | 90            | 8.4  | 7            | 10.1 | 0.62    |

Supplementary Table 2. Prevalence ratio with 95% CI for association with Geriatric Depression after MI (n = 1,140).

| Variable.                             |        | Crude<br>PR (95% CI) |             | Model I<br>APR (95%<br>CI) |             | Model II<br>APR (95%<br>CI) |             | Model III<br>APR (95%<br>CI) |             | Model IV<br>APR (95% CI) |             |
|---------------------------------------|--------|----------------------|-------------|----------------------------|-------------|-----------------------------|-------------|------------------------------|-------------|--------------------------|-------------|
| <i>Childhood mental health status</i> |        |                      |             |                            |             |                             |             |                              |             |                          |             |
| Suicidal ideation (ref = No)          | Yes    | 1.58                 | (1.15–2.15) | 1.55                       | (1.17–2.07) | 1.4                         | (1.04–1.88) | 1.38                         | (1.03–1.86) | 1.38                     | (1.02–1.88) |
| <i>Basic demographics</i>             |        |                      |             |                            |             |                             |             |                              |             |                          |             |
| Age (years)                           |        | 1.02                 | (1.01–1.03) | 1.02                       | (1.01–1.03) | 1.02                        | (1.01–1.03) | 1.02                         | (1–1.03)    | 1.01                     | (0.99–1.02) |
| Sex (ref = Male)                      | Female | 1.21                 | (0.99–1.47) | 1.14                       | (0.94–1.38) | 1.19                        | (0.98–1.45) | 1.1                          | (0.9–1.35)  | 1.14                     | (0.91–1.43) |
| <i>Personality attribute</i>          |        |                      |             |                            |             |                             |             |                              |             |                          |             |
| Neuroticism (ref = Q1)                | Q2     | 1.49                 | (1.13–1.97) | 1.29                       | (0.98–1.71) | 1.29                        | (0.98–1.7)  | 1.26                         | (0.95–1.66) | 1.22                     | (0.93–1.6)  |
|                                       | Q3     | 2.01                 | (1.49–2.72) | 1.61                       | (1.21–2.14) | 1.57                        | (1.19–2.08) | 1.5                          | (1.14–1.99) | 1.39                     | (1.05–1.84) |
|                                       | Q4     | 2.52                 | (1.93–3.29) | 1.94                       | (1.48–2.53) | 1.88                        | (1.44–2.45) | 1.82                         | (1.39–2.37) | 1.76                     | (1.36–2.28) |
| Extroversion (ref = Q1)               | Q2     | 0.7                  | (0.55–0.89) | 0.74                       | (0.58–0.94) | 0.73                        | (0.58–0.93) | 0.73                         | (0.58–0.93) | 0.76                     | (0.59–0.96) |
|                                       | Q3     | 0.56                 | (0.39–0.82) | 0.66                       | (0.46–0.96) | 0.65                        | (0.45–0.94) | 0.67                         | (0.46–0.96) | 0.67                     | (0.47–0.96) |
|                                       | Q4     | 0.44                 | (0.33–0.59) | 0.54                       | (0.4–0.73)  | 0.55                        | (0.41–0.74) | 0.55                         | (0.41–0.75) | 0.62                     | (0.46–0.83) |
| Agreeableness (ref = Q1)              | Q2     | 0.65                 | (0.52–0.8)  | 0.68                       | (0.55–0.84) | 0.67                        | (0.54–0.83) | 0.66                         | (0.54–0.82) | 0.68                     | (0.55–0.84) |
|                                       | Q3     | 0.59                 | (0.41–0.84) | 0.69                       | (0.48–0.97) | 0.68                        | (0.48–0.96) | 0.7                          | (0.49–0.98) | 0.68                     | (0.49–0.95) |
|                                       | Q4     | 0.29                 | (0.19–0.43) | 0.41                       | (0.27–0.61) | 0.41                        | (0.28–0.62) | 0.42                         | (0.28–0.62) | 0.43                     | (0.29–0.63) |
| Conscientiousness (ref = Q1)          | Q2     | 0.74                 | (0.57–0.95) | 0.77                       | (0.6–0.98)  | 0.79                        | (0.62–1)    | 0.83                         | (0.65–1.06) | 0.84                     | (0.66–1.06) |
|                                       | Q3     | 0.73                 | (0.54–0.97) | 0.71                       | (0.53–0.94) | 0.72                        | (0.54–0.96) | 0.78                         | (0.59–1.04) | 0.81                     | (0.61–1.08) |
|                                       | Q4     | 0.6                  | (0.43–0.84) | 0.67                       | (0.48–0.93) | 0.68                        | (0.48–0.95) | 0.71                         | (0.51–0.99) | 0.8                      | (0.57–1.11) |

|                                                         |                 |      |             |      |             |      |             |      |             |      |             |
|---------------------------------------------------------|-----------------|------|-------------|------|-------------|------|-------------|------|-------------|------|-------------|
| Openness (ref = Q1)                                     | Q2              | 0.75 | (0.56–1)    | 0.9  | (0.67–1.21) | 0.94 | (0.7–1.26)  | 0.95 | (0.71–1.27) | 0.93 | (0.7–1.24)  |
|                                                         | Q3              | 0.66 | (0.5–0.87)  | 0.81 | (0.63–1.06) | 0.83 | (0.64–1.08) | 0.82 | (0.64–1.07) | 0.85 | (0.66–1.09) |
|                                                         | Q4              | 0.49 | (0.34–0.69) | 0.69 | (0.48–0.97) | 0.7  | (0.49–0.99) | 0.7  | (0.5–0.99)  | 0.72 | (0.51–1.01) |
| <b>Childhood adversities</b>                            |                 |      |             |      |             |      |             |      |             |      |             |
| ACE score (ref = 0)                                     | 1               | 1.67 | (1.31–2.14) |      |             | 1.52 | (1.2–1.94)  | 1.45 | (1.14–1.84) | 1.44 | (1.13–1.82) |
|                                                         | 2+              | 1.83 | (1.4–2.39)  |      |             | 1.53 | (1.17–2.01) | 1.45 | (1.11–1.89) | 1.35 | (1.04–1.76) |
| <b>Adulthood adversities</b>                            |                 |      |             |      |             |      |             |      |             |      |             |
| Formal education (ref = <9 years)                       | 10–12 years     | 0.82 | (0.66–1.02) |      |             |      |             | 1.02 | (0.82–1.26) | 1.05 | (0.85–1.31) |
|                                                         | 13 years +      | 0.6  | (0.45–0.82) |      |             |      |             | 0.86 | (0.64–1.16) | 0.91 | (0.67–1.23) |
| Occupation (ref=manual/industrial laborer)              | Skilled laborer | 0.58 | (0.41–0.84) |      |             |      |             | 0.75 | (0.52–1.07) | 0.77 | (0.53–1.1)  |
|                                                         | 200–500         | 0.6  | (0.48–0.75) |      |             |      |             | 0.74 | (0.59–0.92) | 0.79 | (0.63–1)    |
| Annual household income (million yen) (ref = < 200)     | 500–900         | 0.58 | (0.41–0.81) |      |             |      |             | 0.67 | (0.47–0.94) | 0.71 | (0.49–1.01) |
|                                                         | 900+            | 0.26 | (0.10–0.64) |      |             |      |             | 0.33 | (0.14–0.8)  | 0.37 | (0.15–0.91) |
| Total score of recent life event stressors              | 1               |      | (1–1)       |      |             |      |             | 1    | (1–1)       | 1    | (1–1)       |
| <b>Current health status &amp; social relationships</b> |                 |      |             |      |             |      |             |      |             |      |             |
| Total number of medical conditions                      |                 | 1.13 | (1.05–1.22) |      |             |      |             |      |             | 1.07 | (0.99–1.16) |
| Marital status (ref = Not married)                      | Married         | 0.65 | (0.53–0.79) |      |             |      |             |      |             | 0.83 | (0.65–1.06) |
| Living arrangement (ref = Alone)                        | With someone    | 0.69 | (0.53–0.9)  |      |             |      |             |      |             | 0.99 | (0.73–1.35) |
| Employment status (ref = No)                            | Yes             | 0.7  | (0.54–0.89) |      |             |      |             |      |             | 0.83 | (0.65–1.07) |
| Giving support (ref = No)                               | Yes             | 0.61 | (0.5–0.75)  |      |             |      |             |      |             | 0.82 | (0.63–1.06) |
| Receiving support (ref = No)                            | Yes             | 0.55 | (0.46–0.67) |      |             |      |             |      |             | 0.78 | (0.61–1)    |
| Help-seeking attitude (ref = Passive)                   | Neutral         | 0.52 | (0.41–0.67) |      |             |      |             |      |             | 0.63 | (0.49–0.79) |
|                                                         | Active          | 0.59 | (0.45–0.78) |      |             |      |             |      |             | 0.78 | (0.6–1.01)  |

Note: MI = multiple imputation; APR = adjusted prevalence ratio; CI = confidential interval. Bold letters indicate statistically significant results where 95%CI did not include 1. Model I includes childhood suicidal ideation, demographics and personality attributes; Model II includes Model I variables + childhood adversities; Model III includes Model II variables + adulthood adversities; Model IV includes Model III variables + current health status and social relations.
